# Supplementary material for: Numerical simulation of 3D boundary-driven acoustic streaming in microfluidic devices
Source: Royal Society of Chemistry journal article supplement (doi:10.1039/c3lc50985k), 2013-11-08
Supplement: c3lc50985k.pdf [file c3lc50985k.pdf]

## Results from models 3 and 4 discussed in Section IV

This file includes the simulation results of in-plane acoustic streaming field and active sound intensity field on the bottom boundary of the main fluid channel in models 3&4.

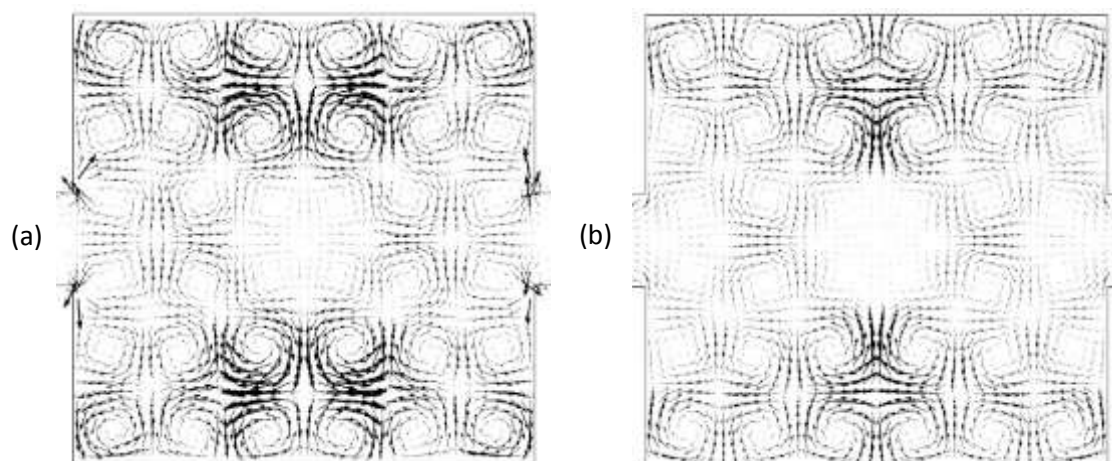

Fig. 1 (a) Modelled acoustic streaming field on the plane  $z=-0.04\text{mm}$ ; (b) Modelled active sound intensity field ( $\text{W}/\text{m}^2$ ) on the bottom boundary of the main fluid channel in model 3

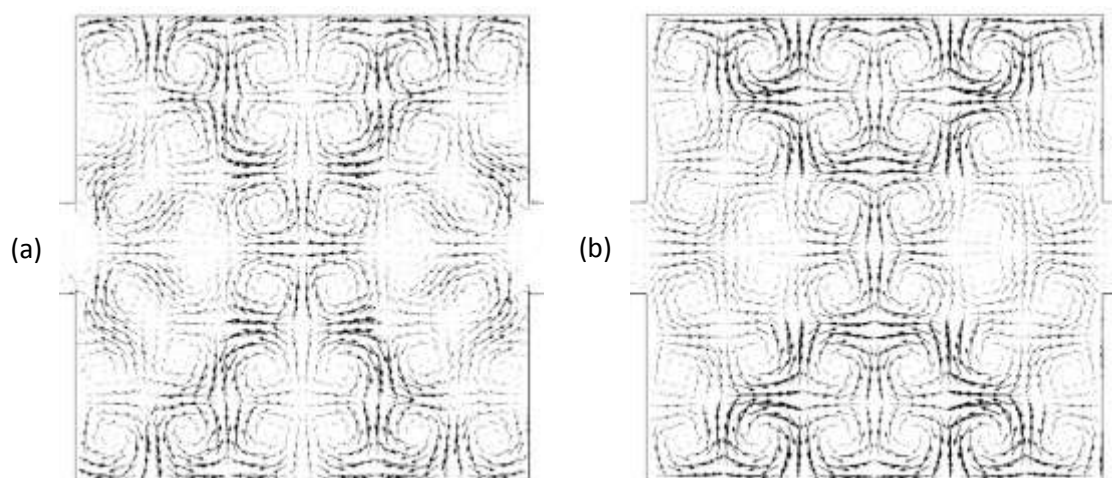

Fig. 2 (a) Modelled acoustic streaming field on the plane  $z=-0.04\text{mm}$ ; (b) Modelled active sound intensity field ( $\text{W}/\text{m}^2$ ) on the bottom boundary of the main fluid channel in model 4
